# Supplementary figures and images for: Glucose metabolism is inhibited by caspases upon the induction of apoptosis
Source: PubMed Central journal article supplement — Cell Death Dis. 2014 Sep 4;5(9):e1406–. doi: 10.1038/cddis.2014.371 (PMC4540195; doi:10.1038/cddis.2014.371), 2014-09-04

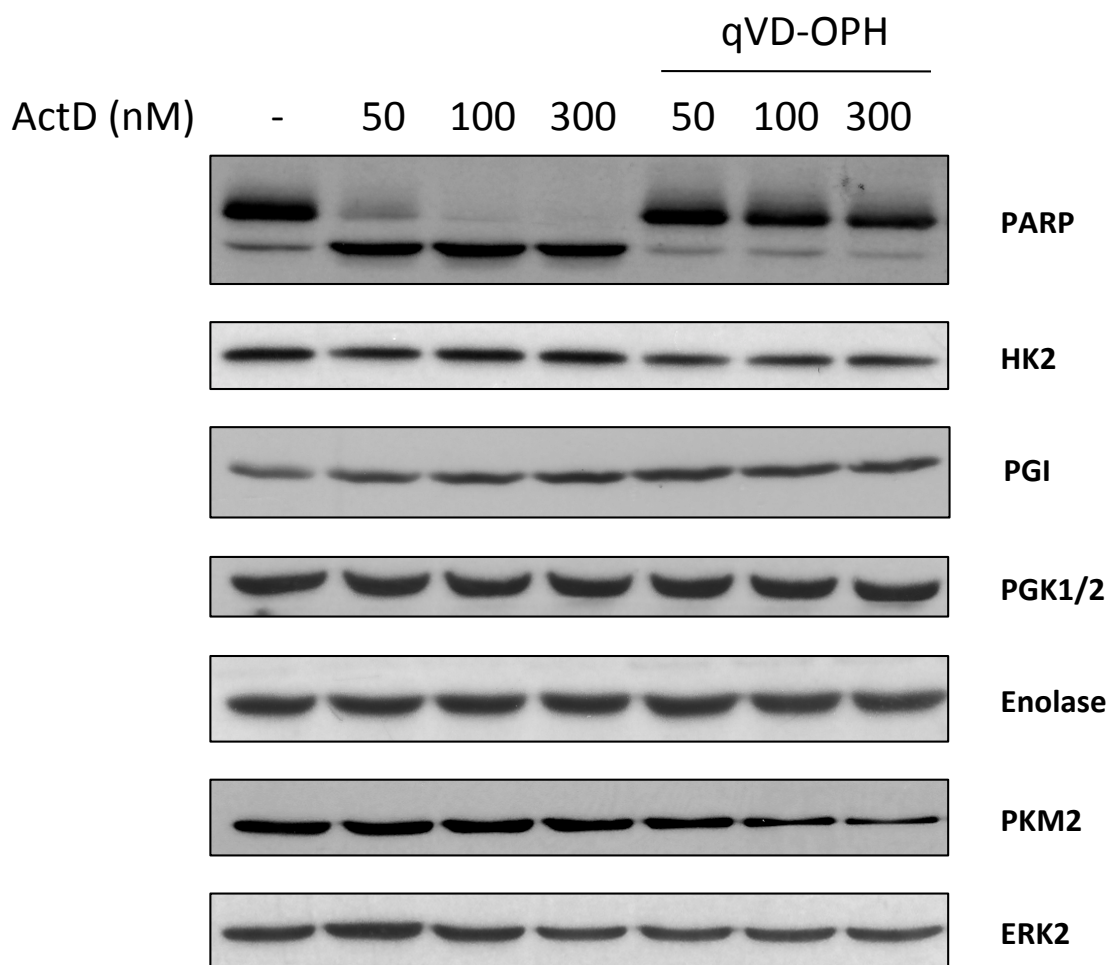

Supplemental Figure 1: Pradelli L.A. et al.

Supplement: cddis2014371x1.pdf [file cddis2014371x1.pdf]
